# Supplementary material for: Incorporation of tetracarboxylate ions into octacalcium phosphate for the development of next-generation biofriendly materials
Source: PubMed Central journal article supplement (PMC9814588; doi:10.1038/s42004-020-00443-5), 2021-01-11
Supplement: 42004_2020_443_MOESM2_ESM.pdf [file 42004_2020_443_MOESM2_ESM.pdf]

## Supplementary Information

### **Incorporation of tetracarboxylate ions into octacalcium phosphate for the development of next-generation biofriendly materials**

Taishi Yokoi<sup>1,2\*</sup>, Tomoyo Goto<sup>3</sup>, Mitsuo Hara<sup>4</sup>, Tohru Sekino<sup>3</sup>, Takahiro Seki<sup>4</sup>,  
Masanobu Kamitakahara<sup>5</sup>, Chikara Ohtsuki<sup>6</sup>, Satoshi Kitaoka<sup>2</sup>, Seiji Takahashi<sup>2</sup> and  
Masakazu Kawashita<sup>1</sup>

<sup>1</sup> Institute of Biomaterials and Bioengineering, Tokyo Medical and Dental University (TMDU), 2-3-10 Kanda-Surugadai, Chiyoda-ku, Tokyo 101-0062, Japan

<sup>2</sup> Materials Research and Development Laboratory, Japan Fine Ceramics Center, 2-4-1 Mutsuno, Atsuta-ku, Nagoya 456-8587, Japan

<sup>3</sup> The Institute of Scientific and Industrial Research, Osaka University, 8-1 Mihogaoka, Ibaraki 567-0047, Japan

<sup>4</sup> Department of Molecular and Macromolecular Chemistry, Graduate School of Engineering, Nagoya University, Furo-cho, Chikusa-ku, Nagoya, 464-8603, Japan

<sup>5</sup> Graduate School of Environmental Studies, Tohoku University, 6-6-20 Aoba, Aramaki, Aoba-ku, Sendai 980-8579, Japan

<sup>6</sup> Department of Materials Chemistry, Graduate School of Engineering, Nagoya University, Furo-cho, Chikusa-ku, Nagoya 464-8603, Japan

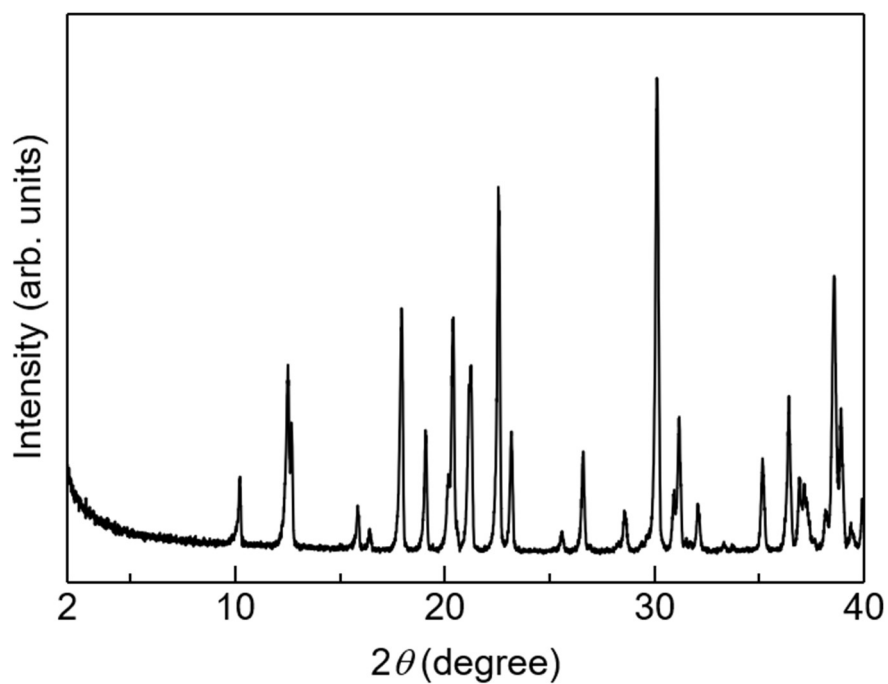

**Supplementary Figure 1:** Powder XRD pattern of calcium pyromellitate. Calcium pyromellitate was synthesised by mixing the following solutions at 60.5 °C: 5 cm<sup>3</sup> of 1 mol·dm<sup>-3</sup> CaCl<sub>2</sub> solution and 200 ml of acetate buffer solution containing 5 mol·dm<sup>-3</sup> pyromellitic acid (pH=5.5).

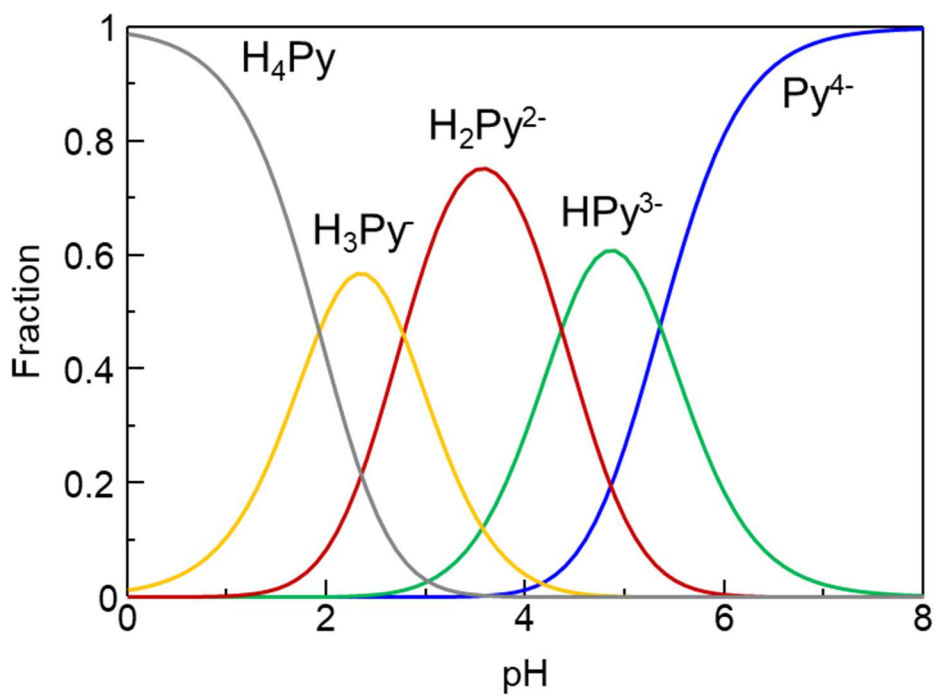

**Supplementary Figure 2:** Dissociation states of pyromellitate ions with respect to the pH. The dissociation states of pyromellitic acid were calculated based on the following dissociation constants:  $pK_{a1}=1.92$ ,  $pK_{a2}=2.77$ ,  $pK_{a3}=4.36$ , and  $pK_{a4}=5.35$  [Ref. 39].

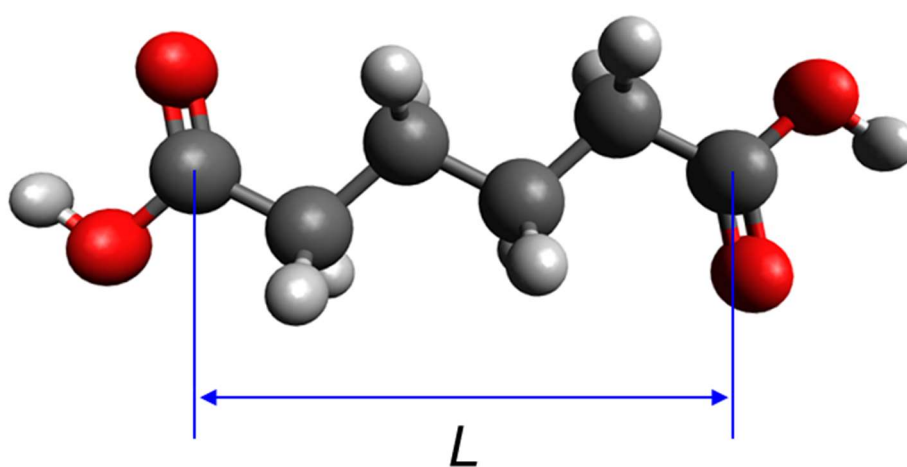

**Supplementary Figure 3:** Schematic illustration showing the definition of  $L$ .  $L$  is the distance between the carbon atoms of two carboxy groups of a carboxylic acid (in this case adipic acid).
